# Supplementary material
Source: publisher figshare collection journal article supplement (https://karger.figshare.com/articles/dataset/_/3442787)

**Figure S2:** RT-PCR on 10% of RNA identified as DEG by microarrays analysis. The PCR were performed as described in Material & Methods section with the following primer pairs. APOH (NM 173992): APOH-F TCA gCg TTT ACA AgC CgT Tg / APOH-R TTT CCA AAC ATC gCg Tgg T; BTN1A1 (M 35551): BTN-F gTg gAT CTg AgC AAT Tgg CAA g / BTN-R ACC CTg Agg AgA AgC AgC A; NUDT14 (NM 001105652): NUDT14-F TCg gCg TgA TCT TTg gTA T / NUDT14-R gCC AgC CTT TAT Tgg gTC T ; TALDO1 (BT021534): TALDO1-F CAT gAC CCT gCT CTT CTC CT / TALDO1-R ggA CTT CTT gTC TgT gTT ggC ; GPRIN2 (NM 001205783): GPRIN2-F CgC AgA TCA CAg gAC TgC Ag / GPRIN2-R CAC ACg Tgg CTC TTg ggA A.

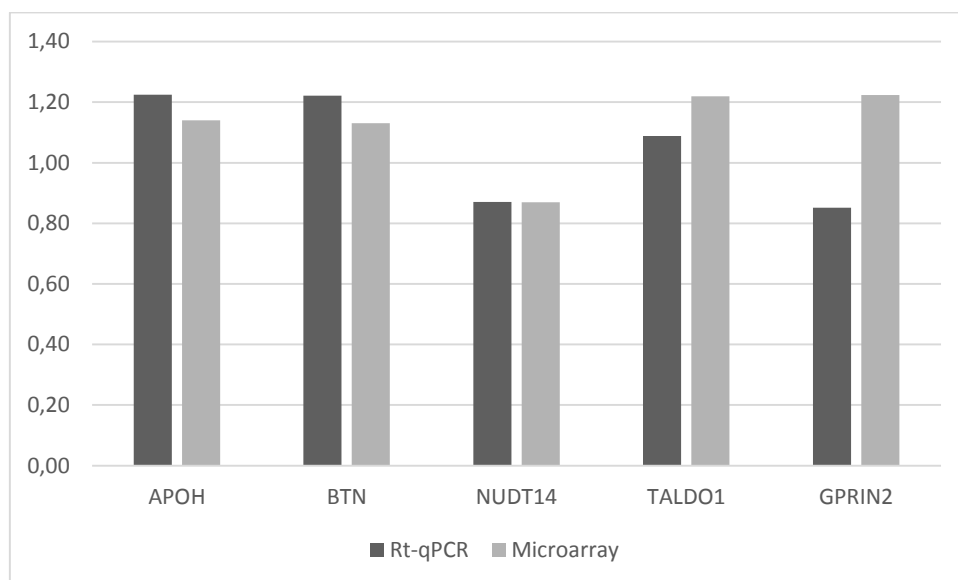

Supplement: Supplementary file 1 [file 1]
