# Supplementary material
Source: publisher figshare collection journal article supplement (https://karger.figshare.com/articles/dataset/_/3442787)
Supplement: Supplementary file 2 [file 1]

**Table S2.** Effect of diet on milk fatty acid composition in cows

|            | Treatment <sup>1</sup>   |                    |                    |                    | SEM<br>n= 12 | <i>P</i> |
|------------|--------------------------|--------------------|--------------------|--------------------|--------------|----------|
|            | HF                       | HF-RS              | LF                 | LF-SO              |              |          |
| Fatty acid | (g/100 g of fatty acids) |                    |                    |                    |              |          |
| C4:0       | 3.10                     | 2.99               | 2.98               | 2.95               | 0.082        | 0.57     |
| C5:0       | 0.005                    | 0.010              | 0.073              | 0.005              | 0.034        | 0.44     |
| C6:0       | 2.19 <sup>c</sup>        | 1.85 <sup>b</sup>  | 2.25 <sup>c</sup>  | 1.64 <sup>a</sup>  | 0.041        | 0.001    |
| C7:0       | 0.022 <sup>c</sup>       | 0.014 <sup>b</sup> | 0.023 <sup>c</sup> | 0.005 <sup>a</sup> | 0.001        | 0.001    |
| C8:0       | 1.40 <sup>c</sup>        | 1.06 <sup>b</sup>  | 1.45 <sup>c</sup>  | 0.88 <sup>a</sup>  | 0.029        | 0.001    |
| C9:0       | 0.030 <sup>c</sup>       | 0.018 <sup>b</sup> | 0.031 <sup>c</sup> | 0.012 <sup>a</sup> | 0.002        | 0.001    |
| C10:0      | 3.28 <sup>c</sup>        | 2.19 <sup>b</sup>  | 3.41 <sup>c</sup>  | 1.82 <sup>a</sup>  | 0.075        | 0.001    |
| C10:1      | 0.39 <sup>c</sup>        | 0.26 <sup>b</sup>  | 0.41 <sup>c</sup>  | 0.19 <sup>a</sup>  | 0.010        | 0.001    |
| C11:0      | 0.06 <sup>c</sup>        | 0.03 <sup>b</sup>  | 0.05 <sup>c</sup>  | 0.02 <sup>a</sup>  | 0.004        | 0.001    |
| C12:0      | 3.81 <sup>c</sup>        | 2.40 <sup>b</sup>  | 3.92 <sup>c</sup>  | 2.06 <sup>a</sup>  | 0.077        | 0.001    |
| C13:0      | 0.10 <sup>b</sup>        | 0.09 <sup>b</sup>  | 0.10 <sup>b</sup>  | 0.07 <sup>a</sup>  | 0.005        | 0.001    |
| iso14      | 0.18 <sup>b</sup>        | 0.17 <sup>b</sup>  | 0.14 <sup>a</sup>  | 0.12 <sup>a</sup>  | 0.006        | 0.001    |
| C14:0      | 12.41 <sup>c</sup>       | 9.58 <sup>b</sup>  | 12.46 <sup>c</sup> | 8.59 <sup>a</sup>  | 0.196        | 0.001    |
| iso15      | 0.36 <sup>c</sup>        | 0.34 <sup>c</sup>  | 0.30 <sup>b</sup>  | 0.25 <sup>a</sup>  | 0.010        | 0.001    |
| ante15     | 0.68 <sup>c</sup>        | 0.65 <sup>c</sup>  | 0.59 <sup>b</sup>  | 0.49 <sup>a</sup>  | 0.018        | 0.001    |
| C14:1cis9  | 1.24 <sup>b</sup>        | 0.87 <sup>a</sup>  | 1.16 <sup>b</sup>  | 0.79 <sup>a</sup>  | 0.031        | 0.001    |
| C15:0      | 1.30 <sup>c</sup>        | 1.21 <sup>b</sup>  | 1.16 <sup>b</sup>  | 0.96 <sup>a</sup>  | 0.024        | 0.001    |
| iso16      | 0.33 <sup>c</sup>        | 0.28 <sup>b</sup>  | 0.30 <sup>bc</sup> | 0.24 <sup>a</sup>  | 0.009        | 0.001    |
| C16:0      | 33.11 <sup>c</sup>       | 23.20 <sup>b</sup> | 32.87 <sup>c</sup> | 19.82 <sup>a</sup> | 0.600        | 0.001    |
| iso17      | 0.41 <sup>b</sup>        | 0.38 <sup>a</sup>  | 0.38 <sup>a</sup>  | 0.44 <sup>c</sup>  | 0.008        | 0.001    |
| C16:1tr9   | 0.06 <sup>a</sup>        | 0.07 <sup>a</sup>  | 0.05 <sup>a</sup>  | 0.27 <sup>b</sup>  | 0.011        | 0.001    |
| C16:1tr11  | 0.010 <sup>a</sup>       | 0.026 <sup>b</sup> | 0.014 <sup>a</sup> | 0.042 <sup>c</sup> | 0.002        | 0.001    |

|                 |                     |                     |                     |                    |       |       |
|-----------------|---------------------|---------------------|---------------------|--------------------|-------|-------|
| C16:1cis9       | 1.49 <sup>b</sup>   | 1.07 <sup>a</sup>   | 1.38 <sup>b</sup>   | 0.96 <sup>a</sup>  | 0.053 | 0.001 |
| C16:1cis11      | 0.034 <sup>b</sup>  | 0.029 <sup>ab</sup> | 0.030 <sup>ab</sup> | 0.025 <sup>a</sup> | 0.003 | 0.09  |
| C17:0           | 0.58 <sup>d</sup>   | 0.55 <sup>c</sup>   | 0.52 <sup>b</sup>   | 0.47 <sup>a</sup>  | 0.007 | 0.001 |
| iso18           | 0.061 <sup>c</sup>  | 0.055 <sup>b</sup>  | 0.052 <sup>b</sup>  | 0.044 <sup>a</sup> | 0.002 | 0.001 |
| C17:1           | 0.23 <sup>b</sup>   | 0.22 <sup>b</sup>   | 0.19 <sup>a</sup>   | 0.18 <sup>a</sup>  | 0.007 | 0.001 |
| C18:0           | 8.33 <sup>a</sup>   | 15.44 <sup>c</sup>  | 9.21 <sup>a</sup>   | 13.85 <sup>b</sup> | 0.455 | 0.001 |
| C18:1tr4        | 0.006 <sup>a</sup>  | 0.031 <sup>b</sup>  | 0.007 <sup>a</sup>  | 0.045 <sup>c</sup> | 0.003 | 0.001 |
| C18:1tr5        | 0.005 <sup>a</sup>  | 0.021 <sup>b</sup>  | 0.007 <sup>a</sup>  | 0.032 <sup>c</sup> | 0.003 | 0.001 |
| C18:1tr6,7,8    | 0.12 <sup>a</sup>   | 0.36 <sup>b</sup>   | 0.13 <sup>a</sup>   | 0.68 <sup>c</sup>  | 0.015 | 0.001 |
| C18:1tr9        | 0.16 <sup>a</sup>   | 0.30 <sup>b</sup>   | 0.16 <sup>a</sup>   | 0.53 <sup>c</sup>  | 0.011 | 0.001 |
| C18:1tr10       | 0.17 <sup>a</sup>   | 0.30 <sup>a</sup>   | 0.19 <sup>a</sup>   | 1.34 <sup>b</sup>  | 0.097 | 0.001 |
| C18:1t11        | 0.96 <sup>a</sup>   | 1.20 <sup>a</sup>   | 0.77 <sup>a</sup>   | 5.17 <sup>b</sup>  | 0.173 | 0.001 |
| C18:1tr12       | 0.12 <sup>a</sup>   | 0.29 <sup>b</sup>   | 0.14 <sup>a</sup>   | 0.70 <sup>c</sup>  | 0.012 | 0.001 |
| C18:1t13        | 0.31 <sup>a</sup>   | 0.60 <sup>b</sup>   | 0.34 <sup>a</sup>   | 0.95 <sup>c</sup>  | 0.051 | 0.001 |
| C18:1cis9       | 17.32 <sup>a</sup>  | 26.08 <sup>b</sup>  | 17.32 <sup>a</sup>  | 25.34 <sup>b</sup> | 0.504 | 0.001 |
| C18:1cis11      | 0.51 <sup>ab</sup>  | 0.54 <sup>b</sup>   | 0.47 <sup>a</sup>   | 0.55 <sup>b</sup>  | 0.016 | 0.02  |
| C18:1cis12      | 0.09 <sup>a</sup>   | 0.11 <sup>a</sup>   | 0.10 <sup>a</sup>   | 0.30 <sup>b</sup>  | 0.009 | 0.001 |
| C18:1cis13      | 0.04 <sup>a</sup>   | 0.07 <sup>b</sup>   | 0.04 <sup>a</sup>   | 0.08 <sup>b</sup>  | 0.004 | 0.001 |
| C18:1cis14      | 0.16 <sup>a</sup>   | 0.30 <sup>b</sup>   | 0.18 <sup>a</sup>   | 0.51 <sup>c</sup>  | 0.011 | 0.001 |
| C19:0           | 0.054 <sup>bc</sup> | 0.058 <sup>c</sup>  | 0.048 <sup>b</sup>  | 0.018 <sup>a</sup> | 0.000 | 0.001 |
| C18:1cis15+tr17 | 0.07 <sup>a</sup>   | 0.10 <sup>b</sup>   | 0.07 <sup>a</sup>   | 0.14 <sup>c</sup>  | 0.004 | 0.001 |
| C18:2c9tr13     | 0.11 <sup>a</sup>   | 0.17 <sup>b</sup>   | 0.10 <sup>a</sup>   | 0.28 <sup>c</sup>  | 0.007 | 0.001 |
| C18:2c9t12      | 0.029 <sup>a</sup>  | 0.062 <sup>b</sup>  | 0.041 <sup>a</sup>  | 0.118 <sup>c</sup> | 0.006 | 0.001 |
| C18:2t11c15     | 0.035 <sup>ab</sup> | 0.062 <sup>c</sup>  | 0.024 <sup>a</sup>  | 0.042 <sup>b</sup> | 0.005 | 0.001 |
| 18:2n-6         | 1.11 <sup>b</sup>   | 0.88 <sup>a</sup>   | 1.23 <sup>c</sup>   | 1.33 <sup>d</sup>  | 0.031 | 0.001 |
| C20:0           | 0.13 <sup>a</sup>   | 0.26 <sup>b</sup>   | 0.13 <sup>a</sup>   | 0.13 <sup>a</sup>  | 0.007 | 0.001 |

|             |                    |                     |                     |                     |       |       |
|-------------|--------------------|---------------------|---------------------|---------------------|-------|-------|
| C18:3n6     | 0.020 <sup>a</sup> | 0.010 <sup>a</sup>  | 0.027 <sup>b</sup>  | 0.016 <sup>a</sup>  | 0.003 | 0.002 |
| C20:1cis8   | 0.11 <sup>a</sup>  | 0.20 <sup>b</sup>   | 0.10 <sup>a</sup>   | 0.11 <sup>a</sup>   | 0.006 | 0.001 |
| C20:1cis11  | 0.026 <sup>a</sup> | 0.055 <sup>b</sup>  | 0.023 <sup>a</sup>  | 0.037 <sup>a</sup>  | 0.006 | 0.007 |
| C18:3n3     | 0.38 <sup>c</sup>  | 0.38 <sup>c</sup>   | 0.30 <sup>b</sup>   | 0.22 <sup>a</sup>   | 0.009 | 0.001 |
| CLA(c9tr11) | 0.45 <sup>a</sup>  | 0.51 <sup>a</sup>   | 0.35 <sup>a</sup>   | 2.27 <sup>b</sup>   | 0.085 | 0.001 |
| C21:0       | 0.012              | 0.011               | 0.011               | 0.008               | 0.003 | 0.95  |
| Total CLA   | 0.49 <sup>a</sup>  | 0.56 <sup>a</sup>   | 0.38 <sup>a</sup>   | 2.35 <sup>b</sup>   | 0.087 | 0.001 |
| C20:2n6     | 0.01               | 0.01                | 0.01                | 0.01                | 0.002 | 0.08  |
| C22:0       | 0.06 <sup>b</sup>  | 0.08 <sup>c</sup>   | 0.05 <sup>a</sup>   | 0.06 <sup>b</sup>   | 0.003 | 0.001 |
| C20:3n6     | 0.07 <sup>b</sup>  | 0.05 <sup>a</sup>   | 0.07 <sup>b</sup>   | 0.05 <sup>a</sup>   | 0.002 | 0.001 |
| C20:4n6     | 0.10 <sup>c</sup>  | 0.07 <sup>b</sup>   | 0.10 <sup>c</sup>   | 0.06 <sup>a</sup>   | 0.002 | 0.001 |
| C22:2n6     | 0.023 <sup>b</sup> | 0.022 <sup>b</sup>  | 0.026 <sup>b</sup>  | 0.013 <sup>a</sup>  | 0.002 | 0.008 |
| C24:0       | 0.037              | 0.038               | 0.037               | 0.032               | 0.003 | 0.64  |
| C20:5n3     | 0.042 <sup>c</sup> | 0.036 <sup>bc</sup> | 0.034 <sup>b</sup>  | 0.013 <sup>a</sup>  | 0.003 | 0.001 |
| C22:4n6     | 0.012 <sup>c</sup> | 0.0001 <sup>a</sup> | 0.008 <sup>bc</sup> | 0.004 <sup>ab</sup> | 0.002 | 0.005 |
| C22:5n3     | 0.069 <sup>c</sup> | 0.061 <sup>b</sup>  | 0.073 <sup>c</sup>  | 0.043 <sup>a</sup>  | 0.003 | 0.001 |

<sup>a-c</sup> Means within a row with different superscripts differ ( $P < 0.05$ ).

<sup>1</sup> Treatments: HF = high forage; HF-RS = high forage with whole intact rapeseeds; LF = low forage; LF-SO = low forage with sunflower oil.

<sup>2</sup> CLA = conjugated linoleic acid.
