# Supplementary material
Source: publisher figshare collection journal article supplement (https://karger.figshare.com/articles/dataset/_/3442787)
Supplement: Supplementary file 3 [file 1]

Table S1: Hybridization design of microarrays used for statistical analysis

|                    | Cow  | Cy5   |       | Cy3   |       | Total cows per comparison |
|--------------------|------|-------|-------|-------|-------|---------------------------|
|                    |      | Stage | Diet  | Stage | Diet  |                           |
| <b>Dye-swap 1</b>  | 4044 | P1    | LF    | P2    | LF-SO | 9 cows LF                 |
|                    | 4044 | P2    | LF-SO | P1    | LF    |                           |
| <b>Dye-swap 2</b>  | 4065 | P1    | LF    | P2    | LF-SO |                           |
|                    | 4065 | P2    | LF-SO | P1    | LF    |                           |
| <b>Dye-swap 3</b>  | 4035 | P4    | LF    | P1    | LF-SO | Vs                        |
|                    | 4035 | P1    | LF-SO | P4    | LF    |                           |
| <b>Dye-swap 4</b>  | 4051 | P1    | LF-SO | P4    | LF    |                           |
|                    | 4051 | P4    | LF    | P1    | LF-SO |                           |
| <b>Dye-swap 5</b>  | 4055 | P1    | LF-SO | P4    | LF    | 9 cows LF-SO              |
|                    | 4055 | P4    | LF    | P1    | LF-SO |                           |
| <b>Dye-swap 6</b>  | 4043 | P2    | LF    | P3    | LF-SO |                           |
|                    | 4043 | P3    | LF-SO | P2    | LF    |                           |
| <b>Dye-swap 7</b>  | 4050 | P2    | LF    | P3    | LF-SO |                           |
|                    | 4050 | P3    | LF-SO | P2    | LF    |                           |
| <b>Dye-swap 8</b>  | 4016 | P2    | LF    | P3    | LF-SO |                           |
|                    | 4016 | P3    | LF-SO | P2    | LF    |                           |
| <b>Dye-swap 9</b>  | 4041 | P3    | LF    | P4    | LF-SO |                           |
|                    | 4041 | P4    | LF-SO | P3    | LF    |                           |
|                    |      |       |       |       |       |                           |
| <b>Dye-swap 10</b> | 4041 | P1    | HF    | P2    | HF-RS | 8 cows HF                 |
|                    | 4041 | P2    | HF-RS | P1    | HF    |                           |
| <b>Dye-swap 11</b> | 4056 | P1    | HF    | P2    | HF-RS |                           |
|                    | 4056 | P2    | HF-RS | P1    | HF    |                           |
| <b>Dye-swap 12</b> | 4043 | P1    | HF-RS | P4    | HF    | Vs                        |
|                    | 4043 | P4    | HF    | P1    | HF-RS |                           |
| <b>Dye-swap 13</b> | 4050 | P1    | HF-RS | P4    | HF    |                           |
|                    | 4050 | P4    | HF    | P1    | HF-RS |                           |
| <b>Dye-swap 14</b> | 4035 | P2    | HF    | P3    | HF-RS | 8 cows HF-RS              |
|                    | 4035 | P3    | HF-RS | P2    | HF    |                           |
| <b>Dye-swap 15</b> | 4055 | P2    | HF    | P3    | HF-RS |                           |
|                    | 4055 | P3    | HF-RS | P2    | HF    |                           |
| <b>Dye-swap 16</b> | 4044 | P3    | HF    | P4    | HF-RS |                           |
|                    | 4044 | P4    | HF-RS | P3    | HF    |                           |
| <b>Dye-swap 17</b> | 4065 | P3    | HF    | P4    | HF-RS |                           |
|                    | 4065 | P4    | HF-RS | P3    | HF    |                           |
