# Supplementary material
Source: publisher figshare collection journal article supplement (https://karger.figshare.com/articles/dataset/_/3442787)
Supplement: Supplementary file 4 [file 1]

Archive with 7 entries (7 files):
- JNN_201508001_1_6.pdf
- JNN_201508001_1_7.pdf
- JNN_201508001_1_8.pdf
- JNN_201508001_1_9.pdf
- JNN_201508001_1_10.pdf
- JNN_201508001_1_11.xls
- JNN_201508001_1_12.xls
