# Supplementary material
Source: publisher figshare collection journal article supplement (https://karger.figshare.com/articles/dataset/_/3442787)
Supplement: Supplementary file 4 [file 1 › JNN_201508001_1_9.pdf]

**Table S1.** Primer and probe sequences and conditions used for real-time RT-PCR.

| Gene          | Encoded protein                                               | Nucleotide sequence (5' – 3')                                                                                       | T (°C) | Source                       |
|---------------|---------------------------------------------------------------|---------------------------------------------------------------------------------------------------------------------|--------|------------------------------|
| <i>CD36</i>   | Platelet glycoprotein 4                                       | F: ACA GAT GTG GCT TGA GCG TG<br>R: ACT GGG TCT GTG TTT TGC AGG                                                     | 58     | Ollier <i>et al.</i> , 2007  |
| <i>ACACA</i>  | Acetyl-CoA carboxylase alpha                                  | F: CAT GGA AAT GTA CGC GGA CC<br>R: GGT GGT AGA TGG GAA GGA GGA<br>F: CGA GCG GAA GGA GCT GGA GAG CA                | 58     | Bernard <i>et al.</i> , 2005 |
| <i>FASN</i>   | Fatty acid synthase                                           | F: ACA GCC TCT TCC TGT TTG ACG<br>R: CTC TGC ACG ATC AGC TCG AC<br>P: ATC TGG AGG CGC GTG TGG CAG CC                | 60     | Bernard <i>et al.</i> , 2005 |
| <i>LPL</i>    | Lipoprotein lipase                                            | F TTC AGA GGC TAT TAC TGG AAA TCC<br>R: ATG TCA ATC ACA GCA TTC ATT CTA CT<br>P: TTC CAG TGG TGC CGG AAC ACT CCT TC | 60     | Bonnet <i>et al.</i> , 2000  |
| <i>SCD1</i>   | Stearoyl-CoA desaturase                                       | F: TGC TGA CAA CTT ATC TGG ATG C<br>R: AAG GAA TCC TGC AAA CAG CTA<br>P: CCA GAG CCT GCA GAA GTG GCT GGT ATA A      | 60     | Bernard <i>et al.</i> , 2005 |
| <i>FABP3</i>  | Fatty acid binding protein 3, muscle and heart                | F: CCT CTC CTT CCA CTG ACT GC<br>R: TTG ACC TCA GAG CAC CCT TT                                                      | 58     | Jurie <i>et al.</i> , 2007   |
| <i>FABP4</i>  | Fatty acid binding protein 4, adipocyte                       | F: GGT ACC TGG AAA CTT GTC TCC<br>R: CTG ATT TAA TGG TGA CCA CAC                                                    | 58     | Jurie <i>et al.</i> , 2007   |
| <i>SREBF1</i> | Sterol regulatory element binding factor 1                    | F: CCA GCT GAC AGC TCC ATT GA<br>R: TGC GCG CCC ACA AGG GA                                                          | 60     | Harvatine and Bauman, 2006   |
| <i>INSIG1</i> | Insulin induced gene 1                                        | F: CTA GCC TCG AAC TAA AGC CTG ACT<br>R: TTC CTG TCT CAC CAC ACT TCA TCT                                            | 59     | Present study                |
| <i>GPAT</i>   | Glycerol-3-phosphate acyltransferase 1, mitochondrial         | F: ACC AGC AGT TCA TCA CCT TC<br>R: GTA CAC GGC AAC CCT CCT CT                                                      | 58     | Ollier <i>et al.</i> , 2007  |
| <i>DGATI</i>  | Diacylglycerol O-Acyltransferase 1                            | F: AGT GGT GCA TCA GAC ACT TCT A<br>R: CTC ACG GTT GAG CAC GTA GTA                                                  | 58     | Ollier <i>et al.</i> , 2007  |
| <i>SPI</i>    | Sp1 transcription factor                                      | F: GGC AGG TTC AGA AGG CAG TGG T<br>R: CAC TGT TGG CAA GAC GGG CAA                                                  | 60     | Toral <i>et al.</i> , 2013   |
| <i>PPIA</i>   | Peptidyl-prolyl <i>cis-trans</i> isomerase A or cyclophilin A | F: GGA TTT ATG TGT CCA GGG TGG TGA<br>R: CAA GAT GCC AGG ACC TGT ATG<br>P: TCT CCC CAT AGA TGG ACT TGC CAC CAG T    | 60     | Bonnet <i>et al.</i> , 2000  |
| <i>XDH</i>    | Xanthine Dehydrogenase                                        | F: GCC CTG CAG AAC ATG AAT CT<br>R: GCA CAA ATA CTT CCT ACA CCT                                                     | 60     | Ollier <i>et al.</i> , 2009  |

*T* = PCR annealing temperature (°C); F = forward primer; R = reverse primer; P = Taqman probe.

#### REFERENCES :

Bernard L, Leroux C, Bonnet M, Rouel J, Martin P, Chilliard Y: **Expression and nutritional regulation of lipogenic genes in mammary gland and adipose tissues of lactating goats.** *J Dairy Res* 2005, **72**(2):250-255.

Bonnet M, Leroux C, Faulconnier Y, Hocquette JF, Bocquier F, Martin P and Chilliard Y: **Lipoprotein lipase activity and mRNA are up-regulated by refeeding in adipose tissue and cardiac muscle of sheep.** *Journal of Nutrition* 2000, **130**: 749-756.

Jurie C, Cassar-Malek I, Bonnet M, Leroux C, Bauchart D, Boulesteix P, Pethick DW, Hocquette JF: **Adipocyte fatty acid-binding protein and mitochondrial enzyme activities in muscles as relevant indicators of marbling in cattle.** *J. Anim. Sci.* 2007, **85**: 2660–2669.

Harvatine KJ, Bauman DE: **SREBP1 and thyroid hormone responsive spot 14 (S14) are involved in the regulation of bovine mammary lipid synthesis during diet-induced milk fat depression and treatment with CLA.** *The Journal of nutrition* 2006, **136**(10):2468-2474.

Ollier S, Leroux C, de la Foye A, Bernard L, Rouel J, Chilliard Y: **Whole intact rapeseeds or sunflower oil in high-forage or high-concentrate diets affects milk yield, milk composition, and mammary gene expression profile in goats.** *Journal of dairy science* 2009, **92**(11):5544-5560.

Ollier S, Robert-Granie C, Bernard L, Chilliard Y, Leroux C: **Mammary transcriptome analysis of food-deprived lactating goats highlights genes involved in milk secretion and programmed cell death.** *The Journal of nutrition* 2007, **137**(3):560-567.

Toral PG, Bernard L, Delavaud C, Gruffat D, Leroux C, Chilliard Y: **Effects of fish oil and additional starch on tissue fatty acid profile and lipogenic gene mRNA abundance in lactating goats fed a diet containing sunflower-seed oil.** *Animal* 2013, **7**(6):948-56.
