# Supplementary material
Source: publisher figshare collection journal article supplement (https://karger.figshare.com/articles/dataset/_/3442787)
Supplement: Supplementary file 4 [file 1 › JNN_201508001_1_11.xls]

## Sheet: DEG-LFSO vs LF
OLIGO_ID	CB_ACC	GENE SYMBOL	mRNA description	Fonctional category
Bt00002213	CK773158	ADH4	Bos taurus alcohol dehydrogenase 4 (class II), pi polypeptide (ADH4), mRNA	metabolism others
Bt00003384	CK775292	ADNP2	Bos taurus ADNP homeobox 2 (ADNP2), mRNA	Replication/Transcription/Translation
Bt00001941	CK772648	APOH	Bos taurus apolipoprotein H (beta-2-glycoprotein I) (APOH), mRNA	Cellular lipid metabolism & transport
Bt00005477	CK846066	BEST1	Bos taurus bestrophin 1 (BEST1), mRNA	transport others
Bt00004309	CK776931	BOLA2B	PREDICTED: Bos taurus bolA homolog 2B (E. coli) (BOLA2B), mRNA	Cell cycle,celle growth, proliferation, differentiation & death
Bt00007007	CK849087	BTN2A1	PREDICTED: Bos taurus butyrophilin, subfamily 2, member A1 (BTN2A1), mRNA	Cellular lipid metabolism & transport
Bt00004576	CK777516	C8G	Bos taurus complement component 8, gamma polypeptide (C8G), mRNA	Immune, inflammatory and stress response
Bt00002895	CK774412	CILP	PREDICTED: Bos taurus cartilage intermediate layer protein 1-like (LOC100336614), mRNA	Replication/Transcription/Translation
Bt00006379	CK847838	CNTN2	PREDICTED: Bos taurus contactin-2-like (LOC100140960), mRNA	Cell cycle,celle growth, proliferation, differentiation & death
Bt00004257	CK776834	EEPD1	Bos taurus endonuclease/exonuclease/phosphatase family domain containing 1 (EEPD1), mRNA	Replication/Transcription/Translation
Bt00001655	CK772121	ELK4	Bos taurus ELK4, ETS-domain protein (SRF accessory protein 1) (ELK4), mRNA	Replication/Transcription/Translation
Bt00002968	CK774550	ELOVL6	Bos taurus ELOVL fatty acid elongase 6 (ELOVL6), mRNA	Cellular lipid metabolism & transport
Bt00001190	CK771274	ETV1	Bos taurus ets variant 1 (ETV1), mRNA	Replication/Transcription/Translation
Bt00007983	CK951856	GDPD1	PREDICTED: Ovis aries glycerophosphodiester phosphodiesterase domain containing 1 (GDPD1), mRNA	Cellular lipid metabolism & transport
Bt00005698	CK846446	GPRIN2	Bos taurus G protein regulated inducer of neurite outgrowth 2 (GPRIN2), mRNA	Cell cycle,cell growth, proliferation, differentiation & death
Bt00002911	CK774448	GUSB	Bos taurus glucuronidase, beta (GUSB), mRNA	Cellular carbohydrate metabolism & transport
Bt00000046	CK769266	HTR3E	PREDICTED: Bos taurus 5-hydroxytryptamine (serotonin) receptor 3, family member E (HTR3E), partial mRNA	transport others
Bt00006394	CK847862	ICA1	PREDICTED: Ceratotherium simum simum islet cell autoantigen 1, 69kDa, transcript variant 3 (ICA1), mRNA	transport others
Bt00003938	CK776224	KDM6B	PREDICTED: Bos taurus lysine (K)-specific demethylase 6B (KDM6B), mRNA	Replication/Transcription/Translation
Bt00000810	CK770623	KIAA0226	Bos taurus KIAA0226 ortholog (KIAA0226), mRNA	Cell cycle,cell growth, proliferation, differentiation & death
Bt00004146	CK776604	KIAA1524	Bos taurus KIAA1524 ortholog (KIAA1524), mRNA	Cell cycle,cell growth, proliferation, differentiation & death
Bt00006672	CK848426	LONP2	Bos taurus lon peptidase 2, peroxisomal (LONP2), mRNA	Cellular protein metabolism & transport
Bt00002517	CK773723	LOXL3	Bos taurus lysyl oxidase-like 3 (LOXL3), mRNA	Cell cycle,cell growth, proliferation, differentiation & death
1002016116		LPL	Bos taurus lipoprotein lipase (LPL), mRNA	Cellular lipid metabolism & transport
Bt00007253	CK849535	M6PR	Bos taurus mannose-6-phosphate receptor (cation dependent) (M6PR), mRNA	Cellular carbohydrate metabolism & transport
Bt00000789	CK770590	MFSD5	Bos taurus major facilitator superfamily domain containing 5 (MFSD5), mRNA	transport others
Bt00007626	CK944371	MRI1	Bos taurus methylthioribose-1-phosphate isomerase homolog (S. cerevisiae) (MRI1), mRNA	Cellular protein metabolism & transport
Bt00006122	CK847338	MYBBP1A	PREDICTED: Bos taurus MYB binding protein (P160) 1a, transcript variant 1 ou varian 2 (MYBBP1A), mRNA	Replication/Transcription/Translation
Bt00003360	CK775242	NUDT14	Bos taurus nudix (nucleoside diphosphate linked moiety X)-type motif 14 (NUDT14), mRNA	Cellular carbohydrate metabolism & transport
Bt00004857	CK778083	PIK3CD	Bos taurus phosphoinositide-3-kinase, catalytic, delta polypeptide (PIK3CD), mRNA	Immune, inflammatory and stress response
Bt00003620	CK775711	PRRC2A	Bos taurus proline-rich coiled-coil 2A (PRRC2A), mRNA	Immune, inflammatory and stress response
Bt00002498	CK773683	PTPN23	Bos taurus protein tyrosine phosphatase, non-receptor type 23 (PTPN23), mRNA	Cellular protein metabolism & transport
Bt00006936	CK848944	RBM5	Bos taurus RNA binding motif protein 5 (RBM5), mRNA	Replication/Transcription/Translation
Bt00006141	CK847382	RHOBTB2	Bos taurus Rho-related BTB domain containing 2 (RHOBTB2), mRNA	Replication/Transcription/Translation
Bt00001633	CK772085	RHOT2	Bos taurus ras homolog family member T2 (RHOT2), nuclear gene encoding mitochondrial protein, mRNA	Cell cycle,celle growth, proliferation, differentiation & death
Bt00000440	CK769969	RNASE4	Bos taurus ribonuclease, RNase A family, 4 (RNASE4), mRNA_similar to PDZ domain containing 6	Replication/Transcription/Translation
Bt00007286	CK849615	TALDO1	Bos taurus transaldolase 1 (TALDO1), mRNA	Cellular carbohydrate metabolism & transport
Bt00004937	CK778217	TBC1D2B	PREDICTED: Dasypus novemcinctus TBC1 domain family, member 2B (TBC1D2B), mRNA	Cellular protein metabolism & transport
Bt00004687	CK777751	TBX21	Bos taurus T-box 21 (TBX21), mRNA	Immune, inflammatory and stress response
Bt00000170	CK769510	TM4SF1	Bos taurus transmembrane 4 L six family member 1 (TM4SF1), mRNA	Cell cycle,cell growth, proliferation, differentiation & death
Bt00006654	CK848385	TMED5	Bos taurus transmembrane emp24 protein transport domain containing 5 (TMED5), mRNA	transport others
Bt00004247	CK776819	USP12	Bos taurus ubiquitin specific peptidase 12 (USP12), mRNA	Cellular protein metabolism & transport
Bt00003676	CK775804	ZNF592	Bos taurus zinc finger protein 592 (ZNF592), mRNA	Replication/Transcription/Translation
Bt00000717	CK770465	ZNF653	PREDICTED: Bos taurus zinc finger protein 653 (ZNF653), mRNA	Replication/Transcription/Translation
Bt00003746	CK775908	ZNF821	Bos taurus zinc finger protein 821 (ZNF821), mRNA	Replication/Transcription/Translation
Bt00006104	CK847299	EST
Bt00002404	CK773509	EST
Bt00004087	CK776485	EST
Bt00006155	CK847412	EST
