# Supplementary material
Source: publisher figshare collection journal article supplement (https://karger.figshare.com/articles/dataset/_/3442787)
Supplement: Supplementary file 4 [file 1 › JNN_201508001_1_12.xls]

## Sheet: DEG_HFRS-HF vs LFSO-LF
OLIGO_ID	CB_ACC	GENE SYMBOL	mRNA description	Fonctional category
Bt00007511	CK941351	ABCG2	Bos taurus ATP-binding cassette, sub-family G (WHITE), member 2 (ABCG2), mRNA	Immune, inflammatory and stress response
Bt00007197	CK849435	ANXA1	Bos taurus annexin A1 (ANXA1), mRNA	Cellular lipid metabolism & transport
Bt00003197	CK774955	ARPC5L	Bos taurus actin related protein 2/3 complex, subunit 5-like (ARPC5L), mRNA	Cell adhesion & cytoskeleton
Bt00005477	CK846066	BEST1	Bos taurus bestrophin 1 (BEST1), mRNA	transport others
Bt00004309	CK776931	BOLA2B	PREDICTED: Bos taurus bolA homolog 2B (E. coli) (BOLA2B), mRNA	Cell cycle,celle growth, proliferation, differentiation & death
Bt00007007	CK849087	BTN2A1	PREDICTED: Bos taurus butyrophilin, subfamily 2, member A1 (BTN2A1), mRNA	Cellular lipid metabolism & transport
Bt00005410	CK845956	C10orf12	PREDICTED: Bos taurus uncharacterized LOC100849063 (LOC100849063), mRNA	Others (undetermined)
Bt00001096	CK771102	C14H8orf33	Bos taurus chromosome 14 open reading frame, human C8orf33 (C14H8orf33), mRNA	Others (undetermined)
Bt00002837	CK774287	C5H12orf48	PREDICTED: Bos taurus chromosome 5 open reading frame, human C12orf48 (C5H12orf48), mRNA	Others (undetermined)
Bt00001674	CK772150	CCL19	Bos taurus chemokine (C-C motif) ligand 19 (CCL19), mRNA	Immune, inflammatory and stress response
Bt00000942	CK770861	CD1D	Bos taurus CD1D antigen, d polypeptide (CD1D), mRNA	Immune, inflammatory and stress response
Bt00001666	CK772134	CFDP1	Bos taurus craniofacial development protein 1 (CFDP1), mRNA	Cell cycle, proliferation, differentiation & death
Bt00007310	CK849654	CHI3L1	Bos taurus chitinase 3-like 1 (cartilage glycoprotein-39) (CHI3L1), mRNA	Cellular carbohydrate metabolism & transport
Bt00002895	CK774412	CILP	PREDICTED: Bos taurus cartilage intermediate layer protein 1-like (LOC100336614), mRNA	Replication/Transcription/Translation
Bt00008136	CK954628	CNN1	Bos taurus calponin 1, basic, smooth muscle (CNN1), mRNA	Cell adhesion & cytoskeleton
Bt00006379	CK847838	CNTN2	PREDICTED: Bos taurus contactin-2-like (LOC100140960), mRNA	Cell cycle,celle growth, proliferation, differentiation & death
Bt00001307	CK771494	COMTD1	Bos taurus catechol-O-methyltransferase domain containing 1 (COMTD1), mRNA	Replication/Transcription/Translation
Bt00005000	CK778319	COX16	Bos taurus COX16 cytochrome c oxidase assembly homolog (S. cerevisiae) (COX16), nuclear gene encoding mitochondrial protein, mRNA	Cellular protein metabolism & transport
Bt00002065	CK772893	DDX26B	PREDICTED: Bos taurus dEAD/H (Asp-Glu-Ala-Asp/His) box polypeptide 26B-like (LOC540312), mRNA	Others (undetermined)
Bt00003265	CK775070	DNAJB11	DnaJ (Hsp40) homolog, subfamily B, member 11	Cellular protein metabolism & transport
Bt00003996	CK776340	DNMT3A	PREDICTED: Tursiops truncatus DNA (cytosine-5-)-methyltransferase 3 alpha (DNMT3A), partial mRNA	Replication/Transcription/Translation
Bt00003041	CK774687	DRG1	Bos taurus developmentally regulated GTP binding protein 1 (DRG1), mRNA	Replication/Transcription/Translation
Bt00002177	CK773104	EBI3	Bos taurus Epstein-Barr virus induced 3 (EBI3), mRNA	Immune, inflammatory and stress response
Bt00007822	CK948277	EEF1B2	Bos taurus eukaryotic translation elongation factor 1 beta 2, mRNA	Replication/Transcription/Translation
Bt00004257	CK776834	EEPD1	Bos taurus endonuclease/exonuclease/phosphatase family domain containing 1 (EEPD1), mRNA	Replication/Transcription/Translation
Bt00002968	CK774550	ELOVL6	Bos taurus ELOVL fatty acid elongase 6 (ELOVL6), mRNA	Cellular lipid metabolism & transport
Bt00001190	CK771274	ETV1	Bos taurus ets variant 1 (ETV1), mRNA	Replication/Transcription/Translation
Bt00005751	CK846545	FAM171A2	PREDICTED: Bos taurus protein FAM171A2-like (LOC615144), mRNA	Others (undetermined)
Bt00005796	CK846618	GATSL3	Bos taurus GATS protein-like 3 (GATSL3), mRNA	Others (undetermined)
Bt00005698	CK846446	GPRIN2	Bos taurus G protein regulated inducer of neurite outgrowth 2 (GPRIN2), mRNA	Cell cycle,cell growth, proliferation, differentiation & death
Bt00002911	CK774448	GUSB	Bos taurus glucuronidase, beta (GUSB), mRNA	Cellular carbohydrate metabolism & transport
Bt00003806	CK776010	GZMH	PREDICTED: Bos taurus granzyme H (cathepsin G-like 2, protein h-CCPX) (GZMH), mRNA	Cellular protein metabolism & transport
Bt00006394	CK847862	ICA1	PREDICTED: Ceratotherium simum simum islet cell autoantigen 1, 69kDa, transcript variant 3 (ICA1), mRNA	transport others
Bt00003637	CK775739	IFT27	Bos taurus intraflagellar transport 27 homolog (Chlamydomonas) (IFT27), mRNA	Cell cycle, proliferation, differentiation & death
Bt00001596	CK772014	ITGB2	Bos taurus integrin, beta 2 (complement component 3 receptor 3 and 4 subunit) (ITGB2), mRNA	Cellular protein metabolism & transport
Bt00003938	CK776224	KDM6B	PREDICTED: Bos taurus lysine (K)-specific demethylase 6B (KDM6B), mRNA	Replication/Transcription/Translation
Bt00004146	CK776604	KIAA1524	Bos taurus KIAA1524 ortholog (KIAA1524), mRNA	Cell cycle,cell growth, proliferation, differentiation & death
Bt00000496	CK770063	LMCD1	Bos taurus LIM and cysteine-rich domains 1 (LMCD1), mRNA	Replication/Transcription/Translation
Bt00006672	CK848426	LONP2	Bos taurus lon peptidase 2, peroxisomal (LONP2), mRNA	Cellular protein metabolism & transport
Bt00004333	CK776986	LRBA	PREDICTED: Bos taurus LPS-responsive vesicle trafficking, beach and anchor containing (LRBA), mRNA	transport others
Bt00003218	CK774990	METTL1	Bos taurus methyltransferase like 1 (METTL1), mRNA	Replication/Transcription/Translation
Bt00004696	CK777768	MGAT5B	PREDICTED: Ovis aries mannosyl (alpha-1,6-)-glycoprotein beta-1,6-N-acetyl-glucosaminyltransferase, isozyme B (MGAT5B), mRNA	Cellular carbohydrate metabolism & transport
Bt00008144	CK955044	MRPS10	Bos taurus mitochondrial ribosomal protein S10 (MRPS10), nuclear gene encoding mitochondrial protein, mRNA	Replication/Transcription/Translation
Bt00007808	CK948202	MYO1A	Bos taurus myosin IA (MYO1A), mRNA	Cell adhesion & cytoskeleton
Bt00003292	CK775113	MYO1A	Bos taurus myosin IA (MYO1A), mRNA	Cell adhesion & cytoskeleton
Bt00002494	CK773676	NFYA	Bos taurus nuclear transcription factor Y, alpha (NFYA), mRNA	Replication/Transcription/Translation
Bt00003649	CK775757	PARVG	Bos taurus parvin, gamma (PARVG), mRNA	Cell adhesion & cytoskeleton
Bt00004857	CK778083	PIK3CD	Bos taurus phosphoinositide-3-kinase, catalytic, delta polypeptide (PIK3CD), mRNA	Immune, inflammatory and stress response
Bt00001987	CK772742	PLXDC2	Bos taurus plexin domain containing 2 (PLXDC2), mRNA	transport others
Bt00000980	CK770914	PPIB	Bos taurus peptidylprolyl isomerase B (cyclophilin B), mRNA	Cell adhesion & cytoskeleton
Bt00003620	CK775711	PRRC2A	Bos taurus proline-rich coiled-coil 2A (PRRC2A), mRNA	Immune, inflammatory and stress response
Bt00008033	CK952732	PSMD4	Bos taurus proteasome (prosome, macropain) 26S subunit, non-ATPase, 4 (PSMD4), mRNA	Cellular protein metabolism & transport
Bt00001377	CK771633	RBM27	PREDICTED: Mustela putorius furo RNA binding motif protein 27 (RBM27), transcript variant X5, mRNA	Replication/Transcription/Translation
Bt00006936	CK848944	RBM5	Bos taurus RNA binding motif protein 5 (RBM5), mRNA	Replication/Transcription/Translation
Bt00000720	CK770469	RCHY1	Bos taurus ring finger and CHY zinc finger domain containing 1 (RCHY1), mRNA	Cell cycle, proliferation, differentiation & death
Bt00007768	CK947453	RFXANK	Bos taurus regulatory factor X-associated ankyrin-containing protein (RFXANK), mRNA	Replication/Transcription/Translation
Bt00006141	CK847382	RHOBTB2	Bos taurus Rho-related BTB domain containing 2 (RHOBTB2), mRNA	Replication/Transcription/Translation
Bt00001633	CK772085	RHOT2	Bos taurus ras homolog family member T2 (RHOT2), nuclear gene encoding mitochondrial protein, mRNA	Cell cycle,celle growth, proliferation, differentiation & death
Bt00000440	CK769969	RNASE4	Bos taurus ribonuclease, RNase A family, 4 (RNASE4), mRNA_similar to PDZ domain containing 6	Replication/Transcription/Translation
Bt00007734	CK946436	SMEK1	Bos taurus SMEK homolog 1, suppressor of mek1 (Dictyostelium) (SMEK1), mRNA	Replication/Transcription/Translation
Bt00007286	CK849615	TALDO1	Bos taurus transaldolase 1 (TALDO1), mRNA	Cellular carbohydrate metabolism & transport
Bt00004216	CK776752	TET2	PREDICTED: Bos taurus tet methylcytosine dioxygenase 2, transcript variant 1 (TET2), mRNA	Immune, inflammatory and stress response
Bt00000398	CK769906	THOC3	Bos taurus THO complex 3 (THOC3), mRNA	Replication/Transcription/Translation
Bt00000170	CK769510	TM4SF1	Bos taurus transmembrane 4 L six family member 1 (TM4SF1), mRNA	Cell cycle,cell growth, proliferation, differentiation & death
Bt00003695	CK775835	TMEM8C	Bos taurus transmembrane protein 8C (TMEM8C), mRNA	Others (undetermined)
Bt00003316	CK775158	TRIM54	Bos taurus tripartite motif containing 54 (TRIM54), mRNA	Cell adhesion & cytoskeleton
Bt00006772	CK848641	TRPS1	Bos taurus trichorhinophalangeal syndrome I (TRPS1), mRNA	Replication/Transcription/Translation
Bt00004247	CK776819	USP12	Bos taurus ubiquitin specific peptidase 12 (USP12), mRNA	Cellular protein metabolism & transport
Bt00000699	CK770435	WDR85	PREDICTED: Ovis aries WD repeat domain 85 (WDR85), mRNA	Replication/Transcription/Translation
Bt00004957	CK778251	ZAP70	s taurus zeta-chain (TCR) associated protein kinase 70kDa (ZAP70), mRNA	Immune, inflammatory and stress response
Bt00003746	CK775908	ZNF821	Bos taurus zinc finger protein 821 (ZNF821), mRNA	Replication/Transcription/Translation
Bt00001630	CK772077	EST
Bt00006104	CK847299	EST
