# Supplementary material
Source: publisher figshare collection journal article supplement (https://karger.figshare.com/articles/dataset/_/3442787)

**Figure S1:** Experimental and analyses design

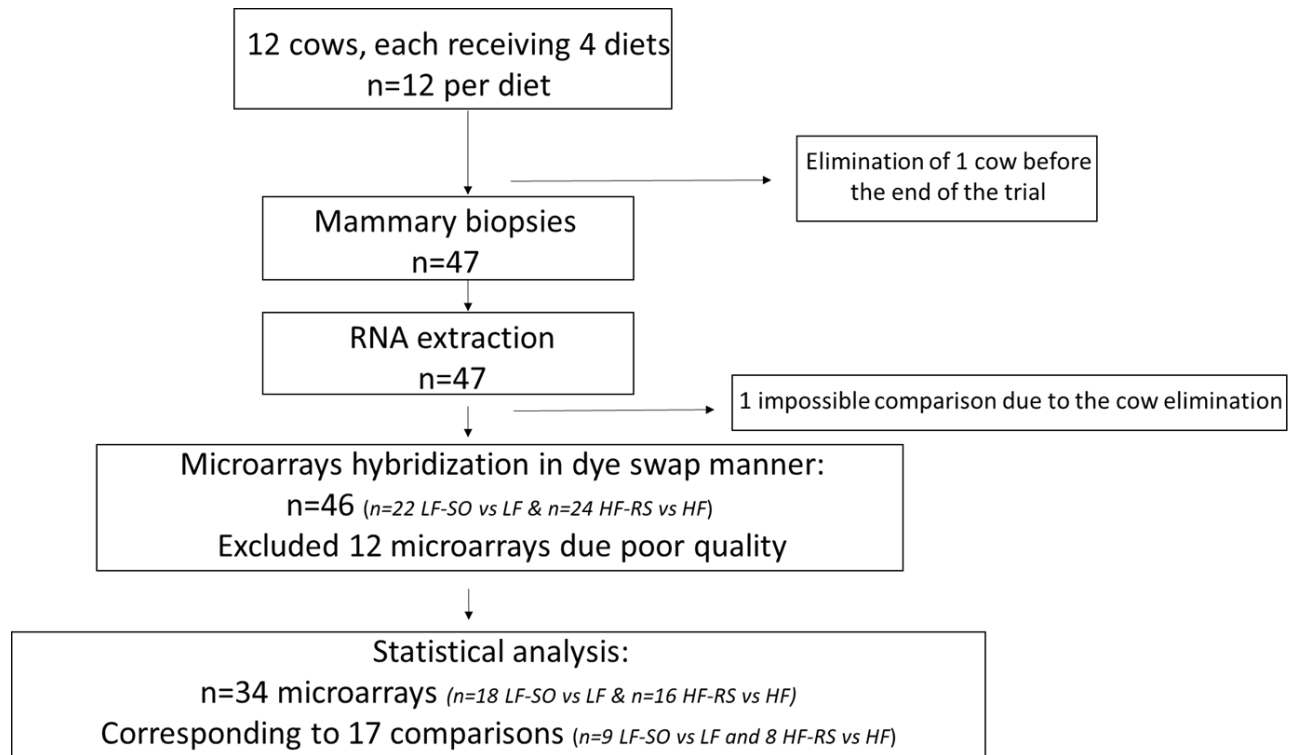

Supplement: Supplementary file 4 [file 1 › JNN_201508001_1_6.pdf]
